# Supplementary material for: Concurrent Chemoradiotherapy with or without Anti-EGFR-Targeted Treatment for Stage II-IVb Nasopharyngeal Carcinoma: Retrospective Analysis with a Large Cohort and Long Follow-up
Source: PubMed Central journal article supplement — Theranostics. 2017 Jun 1;7(8):2314–24. doi: 10.7150/thno.19710 (PMC5505063; doi:10.7150/thno.19710), 2017-06-01
Supplement: thnov07p2314s1.pdf [file thnov07p2314s1.pdf]

# Supplementary Material

## **Pretreatment evaluation**

Pretreatment evaluation included complete history; physical examination, and fiber-optic endoscopic examination of the nasopharynx, oropharynx, and larynx; magnetic resonance imaging (MRI) or computerized tomography (CT) of the head and neck; a conventional work-up including chest x-ray, abdominal ultrasound, and skeletal scintigraphy. Loco-regional lesions were confirmed by biopsy or aspiration. If metastasis was suggested by the conventional work-up, the patient underwent additional evaluations, including [18F]fluorodeoxyglucose positron emission tomography and computed tomography (PET/CT), CT, MRI, biopsy, or aspiration at the site in question. If discrepancies were noted between imaging modalities, the measure value based on MRI, or CT was given priority according to RECIST guidelines [1, 2].

## **Treatment at referral**

All patients received irradiation by IMRT. The target volumes were delineated according to a previously described institutional treatment protocol, which is in accordance with the International Commission on Radiation Units and Measurements reports 50 and 62. Briefly, the primary nasopharyngeal gross tumor volume (GTVnx) and corresponding cervical lymph nodes were determined based on MRI/CT imaging as well as clinical and endoscopic findings. The enlarged retropharyngeal nodes together with primary gross tumor volume (GTV) were outlined as the GTVnx on the

IMRT plans. The first clinical tumor volume (CTV1) was defined as the GTV within 0.5-1.0 cm margin (0.2 to 0.3 cm posterior margin) to encompass the high-risk sites of microscopic extension and the whole nasopharynx. Clinical target volume 2 (CTV2) was defined as the CTV1 plus a 0.5-1.0 cm margin (0.2 to 0.3 cm posterior margin) to encompass the low-risk sites of microscopic extension, the level of the lymph node, and the elective neck area (bilateral levels IIa, IIb, III, and Va are routinely covered for all N0 patients, whereas ipsilateral levels IV, Vb, and supraclavicular fossae were also included for the N1-3 patients). The prescribed doses were 66–70 Gy to the planning target volume (PTV), 60 Gy to PTV1, 54 Gy to PTV2, and 60–66 Gy to the PTV of the involved cervical lymph nodes in 28 to 33 fractions. All patients were treated once daily with five fractions weekly. Dose constraints to the critical structures were within the tolerance according to the RTOG 0225 protocol, and efforts were made to meet the criteria as closely as possible.

According to the 2013 NCCN guidelines for head and neck cancer, CCRT is the standard treatment for NPC patients with II-IVb stage [3]. The study-defined concurrent chemotherapy regimen was 100 mg/m<sup>2</sup> cisplatin on day 1 every 3 weeks for 3 cycles [4]. Nimotuzumab was administered concomitantly with IMRT at a dose of 200 mg weekly, which was diluted in 250 mL saline to obtain a 200 mg suspension and was intravenously infused over 1 hour [5]. Intravenous cetuximab was administered at an initial dose of 400 mg/m<sup>2</sup> followed by 250 mg/m<sup>2</sup> weekly throughout RT weekly [6].

## **Statistical analysis**

All analyses were performed using Stata version 10.0, software and a 2-tailed *P* value of less than 0.05 was considered to be statistically significant.

The clinicopathological characteristics of the cohort are described, and the differences in these characteristics between CTX/NTZ plus CCRT arm and CCRT arm were compared. Complete response was defined as no unequivocal soft tissue mass in the local region and all cervical lymph nodes were less than 10 mm in the short axis. Partial response was defined as at least a 30% decrease in the sum of diameters of target lesions, taking as reference the baseline sum of diameters. Progressive disease was defined as at least a 20% increase in the sum of diameters of target lesions (an absolute increase of at least 5 mm), or the appearance of one or more new lesions. Stable disease was defined as neither sufficient shrinkage to qualify for partial response nor sufficient increase to qualify for progressive disease. The relative dose intensity of CTX, NTZ, or CDDP was calculated as the proportion of the prescribed total dose of each drug in the protocol actually received by the patients in the current analysis. Categorized variables were compared using the  $\chi^2$  test, the correction  $\chi^2$  test, or Fisher's exact test, and continuous variables were compared using the Mann–Whitney *U*-test.

The events for overall survival (OS), distant metastasis-free survival (DMFS), and loco-regional relapse-free survival (LRRFS) were death from any cause, distant metastasis, and loco-regional recurrence, respectively. The duration was calculated from the date of treatment initiation to the date of each event or last follow-up.

Disease-free survival (DFS) was calculated from the date of treatment initiation to loco-regional relapse, distant relapse or tumor-related death (whichever occurred first), or the final follow-up. Survival results were calculated using the Kaplan–Meier method, and differences were compared by log-rank test.

We then performed a multivariate Cox regression analysis to identify independent prognostic factors for survival outcome [7], with the assumption of proportional hazards confirmed based on Schoenfeld residuals [8]; cumulative hazard plots estimated for both groups were parallel, verifying that the assumption of proportional hazards was appropriate. Treatment regimen status (CTX/NTZ plus CCRT vs. CCRT), gender, age, KPS, T and N stages, disease stage were used as covariates. Furthermore, the treatment regimen status and other independent prognostic factors were entered into the multivariate Cox regression model to test their primary effects, and an interaction term between the treatment regimens status and the independent prognostic factors was then added into the model to test the effect of their interaction.

## Reference

1. Tang LQ, Chen QY, Fan W, Liu H, Zhang L, Guo L, et al. Prospective study of tailoring whole-body dual-modality [18F]fluorodeoxyglucose positron emission tomography/computed tomography with plasma Epstein-Barr virus DNA for detecting distant metastasis in endemic nasopharyngeal carcinoma at initial staging. *J Clin Oncol*. 2013; 31: 2861-9.
2. Therasse P, Arbuck SG, Eisenhauer EA, Wanders J, Kaplan RS, Rubinstein L, et al. New guidelines to evaluate the response to treatment in solid tumors. European Organization for Research and Treatment of Cancer, National Cancer Institute of the United States, National Cancer Institute of Canada. *J Natl Cancer Inst*. 2000; 92: 205-16.
3. National Comprehensive Cancer Network: NCCN Guidelines: Head and neck cancers. Version 2.2013. [http://www.nccn.org/professionals/physician\\_gls/f\\_guidelines.asp](http://www.nccn.org/professionals/physician_gls/f_guidelines.asp).
4. Sun Y, Li WF, Chen NY, Zhang N, Hu GQ, Xie FY, et al. Induction chemotherapy plus concurrent chemoradiotherapy versus concurrent chemoradiotherapy alone in locoregionally advanced nasopharyngeal carcinoma: a phase 3, multicentre, randomised controlled trial. *Lancet Oncol*. 2016; 17: 1509-20.

5. Zhai RP, Ying HM, Kong FF, Du CR, Huang S, Zhou JJ, et al. Experience with combination of nimotuzumab and intensity-modulated radiotherapy in patients with locoregionally advanced nasopharyngeal carcinoma. *Onco Targets Ther.* 2015; 8: 3383-90.
6. Chan AT, Hsu MM, Goh BC, Hui EP, Liu TW, Millward MJ, et al. Multicenter, phase II study of cetuximab in combination with carboplatin in patients with recurrent or metastatic nasopharyngeal carcinoma. *J Clin Oncol.* 2005; 23: 3568-76.
7. Cox DR. Regression models and life tables. *J R Stat Soc B.* 1972;34: 187–220.
8. Schoenfeld D. Partial residuals for the proportional hazards regression model. *Biometrika.* 1982; 69: 239–41.

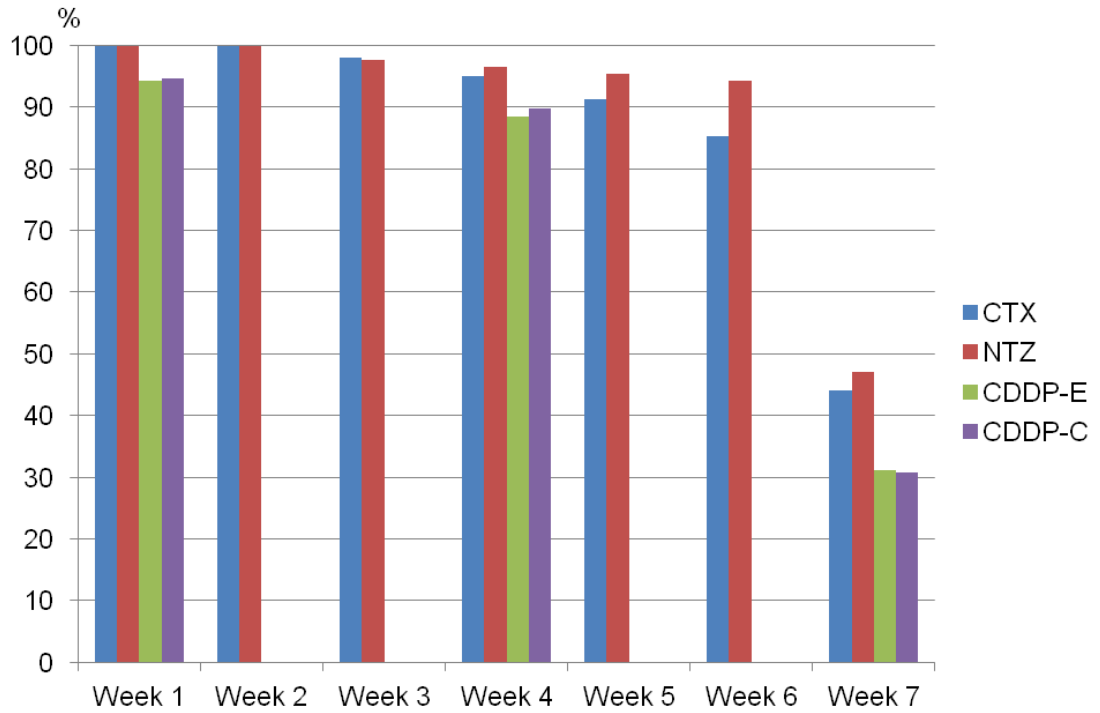

**Supplementary Figure 1. Mean relative dose intensity.** CTX, Cetuximab, at an initial dose of 400 mg/m<sup>2</sup> followed by 250 mg/m<sup>2</sup> weekly throughout RT; NTZ, Nimotuzumab, 200 mg weekly; CDDP-E, Cisplatin used in the CTX/NTZ plus CDDP arm, 100 mg/m<sup>2</sup> on weeks 1, 4, 7; CDDP-C, Cisplatin used in the CDDP arm, 100 mg/m<sup>2</sup> on weeks 1, 4, 7.

**Supplementary Table 1. Baseline characteristics of patients in 1628 eligible cases**

| Characteristic               | CTX/NTZ plus CCRT<br>N = 249 | CCRT<br>N = 1379 |
|------------------------------|------------------------------|------------------|
| Gender                       |                              |                  |
| Female                       | 51 (20.5%)                   | 362 (26.3%)      |
| Male                         | 198 (79.5%)                  | 1017 (73.7%)     |
| Age —yr                      |                              |                  |
| Median                       | 44.6                         | 46.0             |
| Range                        | 11.8-68.5                    | 15.0-78.0        |
| Karnofsky performance status |                              |                  |
| 90-100                       | 225 (90.4%)                  | 1256 (91.1%)     |
| 70-80                        | 24 (9.6%)                    | 123 (8.9%)       |
| T classification             |                              |                  |
| T1                           | 18 (7.2%)                    | 77 (5.6%)        |
| T2                           | 44 (17.7%)                   | 222 (16.1%)      |
| T3                           | 153 (61.4%)                  | 858 (62.2%)      |
| T4                           | 34 (13.7%)                   | 222 (16.1%)      |
| N classification             |                              |                  |
| No                           | 28 (11.2%)                   | 222 (16.1%)      |
| N1                           | 113 (45.4%)                  | 642 (46.6%)      |
| N2                           | 94 (37.8%)                   | 445 (32.3%)      |
| N3                           | 14 (5.6%)                    | 70 (5.1%)        |
| Disease stage                |                              |                  |
| II                           | 31 (12.4%)                   | 157 (11.4%)      |
| III                          | 171 (68.7%)                  | 936 (67.9%)      |
| IV                           | 47 (18.9%)                   | 286 (20.7%)      |

Data are the median or n (%), unless otherwise stated. CCRT, Concurrent Chemoradiotherapy; NTZ, Nimotuzumab; CTX, Cetuximab.

**Supplementary Table 2. Imaging methods in the two treatment groups of the 878-patient well-balanced cohort**

| Techniques                              | CTX/NTZ plus CCRT<br>N = 189 | CCRT<br>N = 689 | P* |
|-----------------------------------------|------------------------------|-----------------|----|
| <b>Nasopharynx and neck</b>             |                              |                 | ns |
| Patient receiving MRI                   | 188 (99.5%)                  | 688 (99.9%)     |    |
| Patient receiving CT                    | 1 (0.5%)                     | 1 (0.1%)        |    |
| <b>Skeleton</b>                         |                              |                 | ns |
| Patient receiving skeletal acintigraphy | 100 (52.9%)                  | 393 (57.0%)     |    |
| Patient receiving skeletal MRI          | 10 (5.3%)                    | 28 (4.1%)       |    |
| Patient receiving PET/CT                | 79 (41.8%)                   | 268 (38.9%)     |    |
| <b>Thorax</b>                           |                              |                 | Ns |
| Patient receiving chest X-ray           | 101 (53.4%)                  | 395 (57.3%)     |    |
| Patient receiving chest CT              | 9 (4.8%)                     | 26 (3.8%)       |    |
| Patient receiving PET/CT                | 79 (41.8%)                   | 268 (38.9%)     |    |
| <b>Abdomen</b>                          |                              |                 | Ns |
| Patient receiving abdominal ultrasound  | 87 (46.0%)                   | 361 (52.4%)     |    |
| Patient receiving abdominal MRI         | 12 (6.3%)                    | 26 (3.8%)       |    |
| Patient receiving abdominal CT          | 11 (5.8%)                    | 34 (4.9%)       |    |
| Patient receiving PET/CT                | 79 (41.8%)                   | 268 (38.9%)     |    |

CCRT, Concurrent Chemoradiotherapy; NTZ, Nimotuzumab; CTX, Cetuximab. \* $\chi^2$ test or Fisher's exact test. Ns, non-significant.



**Supplementary Table 3. Concurrent CTX/NTZ Characteristics and Compliance**

| Variable                                                        | CTX plus CCRT<br>N = 102 | NTZ plus CCRT<br>N = 87 | P*    |
|-----------------------------------------------------------------|--------------------------|-------------------------|-------|
| Patients completing at least one cycle                          | 102 (100.0%)             | 87 (100.0%)             | ns    |
| Patients completing two to five cycles                          | 15 (14.7%)               | 5 (5.7%)                | 0.046 |
| Patients completing six to seven cycles                         | 87 (85.3%)               | 82 (94.3%)              | 0.046 |
| Patients completing at least one cycle with dose reductions, no | 0 (0.0%)                 | 0 (0.0%)                | ns    |

CCRT, Concurrent Chemoradiotherapy; NTZ, Nimotuzumab; CTX, Cetuximab. \* $\chi^2$ test or Fisher's exact test. ns, non-significant.

**Supplementary Table 4. Concurrent Chemoradiotherapy Characteristics and Compliance**

|                                                                        | CTX/NTZ plus CCRT<br>N = 189 | CCRT<br>N = 689  | P* |
|------------------------------------------------------------------------|------------------------------|------------------|----|
| <b>Patients receiving IMRT</b>                                         | 189 (100%)                   | 689 (100%)       | ns |
| Patient completing IMRT                                                | 189 (100%)                   | 689 (100%)       | ns |
| Median (IQR) dose of IMRT (Gy)                                         | 70 (70-70)                   | 70 (70-70)       | ns |
| Median (IQR) dose per fraction (Gy)                                    | 2.19 (2.12-2.26)             | 2.19 (2.12-2.26) | ns |
| Median (IQR) duration of IMRT (days)                                   | 46 (44-49)                   | 46 (44-49)       | ns |
| <b>Patients starting concurrent cisplatin</b>                          |                              |                  | ns |
| Patients completing at least two cycles CC                             | 178 (94.2%)                  | 655 (95.1%)      | ns |
| Patients completing three cycles CC                                    | 59 (31.2%)                   | 212 (30.8%)      | ns |
| Patients receiving concurrent cisplatin $\geq$<br>200mg/m <sup>2</sup> | 123 (75.1%)                  | 473 (72.7%)      | ns |

CCRT, Concurrent Chemoradiotherapy; NTZ, Nimotuzumab; CTX, Cetuximab. \* $\chi^2$ test or Fisher's exact test. ns, non-significant.

**Supplementary Table 5. Survival outcomes in the 878-patient well-balanced cohort**

|                                                                             | CTX/NTZ plus CCRT<br>N = 189 | CCRT<br>N = 689 | HR (95%CI)       | P value |
|-----------------------------------------------------------------------------|------------------------------|-----------------|------------------|---------|
| <b>Disease-free survival</b>                                                |                              |                 |                  |         |
| Failures                                                                    | 18 (9.5%)                    | 113 (16.4%)     |                  |         |
| Proportion of patients<br>disease-free at 3 years                           | 93.5%                        | 86.9%           | 0.57 (0.35-0.94) | 0.028   |
| <b>Loco-regional relapse-free survival</b>                                  |                              |                 |                  |         |
| Loco-regional failures                                                      | 7 (3.7%)                     | 45 (6.5%)       |                  |         |
| Proportion of patients alive<br>without loco-regional<br>failure at 3 years | 97.8%                        | 94.7%           | 0.57 (0.25-1.25) | 0.160   |
| <b>Distant metastasis-free survival</b>                                     |                              |                 |                  |         |
| Distant failures                                                            | 13 (6.8%)                    | 89 (12.9%)      |                  |         |
| Proportion of patients alive<br>without distant failure at 3<br>years       | 94.6%                        | 89.3%           | 0.52 (0.29-0.94) | 0.030   |
| <b>Overall survival</b>                                                     |                              |                 |                  |         |
| Deaths                                                                      | 8 (4.2%)                     | 73 (10.6%)      |                  |         |
| Proportion of patients alive<br>at 3 years                                  | 96.6%                        | 92.9%           | 0.40 (0.19-0.84) | 0.015   |
| <b>Response to treatment (16 weeks after the end of chemotherapy)</b>       |                              |                 |                  |         |
| Overall response                                                            | 189 (100%)                   | 687 (99.7%)     | -----            | ns*     |
| Complete response                                                           | 187 (98.9%)                  | 680 (98.7%)     | -----            | ns*     |
| Partial response                                                            | 2 (1.1%)                     | 7 (1.0%)        | -----            | ns*     |

\* $\chi^2$ test or Fisher's exact test. ns, non-significant

**Supplementary Table 6. Univariate analysis of variables correlated with the treatment regimen status and other prognostic factors in 1628 cases**

|                                            | HR        | CI (95%)  | P value |
|--------------------------------------------|-----------|-----------|---------|
| <b>Disease-free survival</b>               |           |           |         |
| Treatment regimen status                   |           |           |         |
| CCRT                                       | Reference |           |         |
| CTX/NTZ plus CCRT                          | 0.58      | 0.36-0.94 | 0.028   |
| Gender                                     |           |           |         |
| Female                                     | Reference |           |         |
| Male                                       | 1.28      | 0.94-1.75 | 0.119   |
| Age                                        |           |           |         |
| <45                                        | Reference |           |         |
| ≥45                                        | 1.18      | 0.91-1.54 | 0.202   |
| Karnofsky performance status score         |           |           |         |
| 70-80                                      | Reference |           |         |
| 90-100                                     | 1.09      | 0.62-1.67 | 0.507   |
| Tumor stage                                |           |           |         |
| T1                                         | Reference |           |         |
| T2                                         | 1.37      | 0.66-2.85 | 0.397   |
| T3                                         | 1.28      | 0.65-2.51 | 0.476   |
| T4                                         | 2.36      | 1.17-4.76 | 0.017   |
| Node stage                                 |           |           |         |
| N0                                         | Reference |           |         |
| N1                                         | 1.31      | 0.85-2.02 | 0.216   |
| N2                                         | 1.76      | 1.14-2.72 | 0.011   |
| N3                                         | 3.22      | 1.85-5.63 | <0.001  |
| Disease stage                              |           |           |         |
| II                                         | Reference |           |         |
| III                                        | 1.01      | 0.64-1.59 | 0.962   |
| IV                                         | 2.01      | 1.25-3.23 | 0.004   |
| <b>Loco-regional relapse-free survival</b> |           |           |         |
| Treatment regimen status                   |           |           |         |
| CCRT                                       | Reference |           |         |
| CTX/NTZ plus CCRT                          | 0.55      | 0.26-1.19 | 0.131   |
| Gender                                     |           |           |         |
| Female                                     | Reference |           |         |
| Male                                       | 1.17      | 0.73-1.89 | 0.517   |
| Age                                        |           |           |         |
| <45                                        | Reference |           |         |
| ≥45                                        | 1.07      | 0.72-1.61 | 0.734   |
| Karnofsky performance status score         |           |           |         |
| 70-80                                      | Reference |           |         |
| 90-100                                     | 0.88      | 0.52-2.96 | 0.577   |
| Tumor stage                                |           |           |         |
| T1                                         | Reference |           |         |
| T2                                         | 2.24      | 0.67-7.54 | 0.193   |
| T3                                         | 1.46      | 0.46-4.69 | 0.521   |
| T4                                         | 2.46      | 0.73-8.26 | 0.144   |
| Node stage                                 |           |           |         |
| N0                                         | Reference |           |         |

|                                           |           |           |        |
|-------------------------------------------|-----------|-----------|--------|
| N1                                        | 1.09      | 0.59-2.01 | 0.779  |
| N2                                        | 1.27      | 0.68-2.38 | 0.450  |
| N3                                        | 1.87      | 0.76-4.65 | 0.175  |
| <b>Disease stage</b>                      |           |           |        |
| II                                        | Reference |           |        |
| III                                       | 0.70      | 0.38-1.27 | 0.240  |
| IV                                        | 1.12      | 0.58-2.19 | 0.732  |
| <b>Distant metastasis-free survival</b>   |           |           |        |
| <b>Treatment regimen status</b>           |           |           |        |
| CCRT                                      | Reference |           |        |
| CTX/NTZ plus CCRT                         | 0.49      | 0.28-0.90 | 0.028  |
| <b>Gender</b>                             |           |           |        |
| Female                                    | Reference |           |        |
| Male                                      | 1.59      | 1.08-2.35 | 0.019  |
| <b>Age</b>                                |           |           |        |
| <45                                       | Reference |           |        |
| ≥45                                       | 1.13      | 0.83-1.52 | 0.442  |
| <b>Karnofsky performance status score</b> |           |           |        |
| 70-80                                     | Reference |           |        |
| 90-100                                    | 1.11      | 0.72-1.88 | 0.662  |
| <b>Tumor stage</b>                        |           |           |        |
| T1                                        | Reference |           |        |
| T2                                        | 1.03      | 0.46-2.28 | 0.951  |
| T3                                        | 1.05      | 0.51-2.17 | 0.891  |
| T4                                        | 2.06      | 0.97-4.37 | 0.060  |
| <b>Node stage</b>                         |           |           |        |
| N0                                        | Reference |           |        |
| N1                                        | 1.58      | 0.92-2.72 | 0.100  |
| N2                                        | 2.16      | 1.25-3.73 | 0.006  |
| N3                                        | 4.87      | 2.54-9.33 | <0.001 |
| <b>Disease stage</b>                      |           |           |        |
| II                                        | Reference |           |        |
| III                                       | 1.22      | 0.68-2.18 | 0.501  |
| IV                                        | 2.83      | 1.56-5.15 | 0.001  |
| <b>Overall survival</b>                   |           |           |        |
| <b>Treatment regimen status</b>           |           |           |        |
| CCRT                                      | Reference |           |        |
| CTX/NTZ plus CCRT                         | 0.42      | 0.21-0.86 | 0.018  |
| <b>Gender</b>                             |           |           |        |
| Female                                    | Reference |           |        |
| Male                                      | 1.41      | 0.93-2.14 | 0.102  |
| <b>Age</b>                                |           |           |        |
| <45                                       | Reference |           |        |
| ≥45                                       | 1.51      | 1.07-2.12 | 0.018  |
| <b>Karnofsky performance status score</b> |           |           |        |
| 70-80                                     | Reference |           |        |
| 90-100                                    | 0.84      | 0.29-2.06 | 0.582  |
| <b>Tumor stage</b>                        |           |           |        |
| T1                                        | Reference |           |        |
| T2                                        | 1.46      | 0.49-4.31 | 0.496  |

|               |           |           |        |
|---------------|-----------|-----------|--------|
| T3            | 1.65      | 0.61-4.52 | 0.327  |
| T4            | 3.36      | 1.20-9.39 | 0.021  |
| Node stage    |           |           |        |
| N0            | Reference |           |        |
| N1            | 1.22      | 0.70-2.12 | 0.483  |
| N2            | 1.94      | 1.12-3.36 | 0.017  |
| N3            | 3.83      | 1.93-7.61 | <0.001 |
| Disease stage |           |           |        |
| II            | Reference |           |        |
| III           | 1.46      | 0.73-2.91 | 0.284  |
| IV            | 3.27      | 1.61-6.63 | 0.001  |

---

HR, hazard ratio; 95% CI, 95% confidence interval.
